# Supplementary material for: Temperature-, molar ratio- and counterion-effects on the crystal growth of bipyridinium-bis(alkylcarboxylic acid)–crown ether pseudorotaxanes
Source: Royal Society of Chemistry journal article supplement (doi:10.1039/b615273b), 2007-01-01
Supplement: b615273b.pdf [file b615273b.pdf]

## Temperature-, molar ratio- and counterion-effect on the crystal growth of bipyridinium-bis-alkylcarboxylic acid/crown ether pseudorotaxanes

### Electronic supplementary information

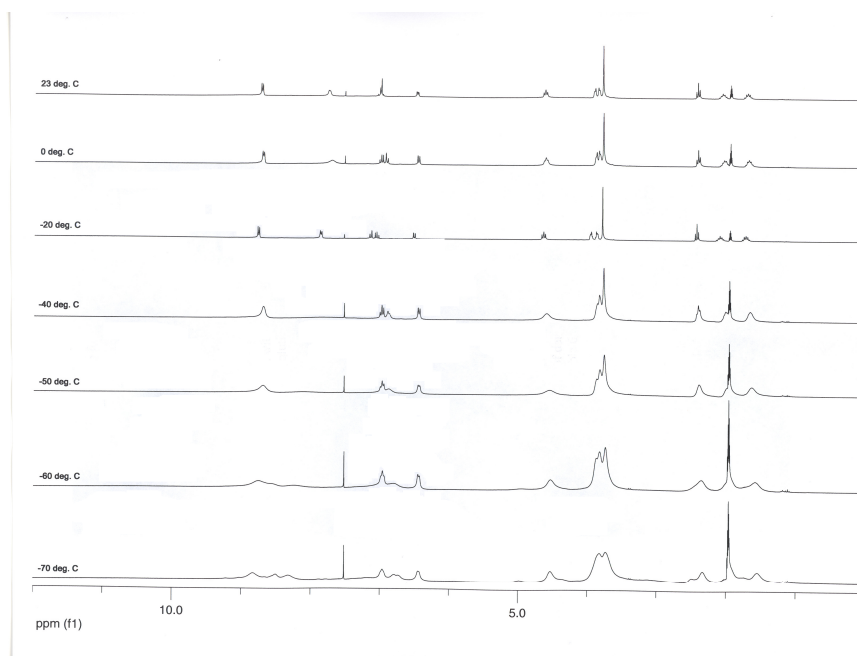

**Fig. S1:** Variable-temperature <sup>1</sup>H-NMR spectra for 4·2PF<sub>6</sub>/BN-38-C-10

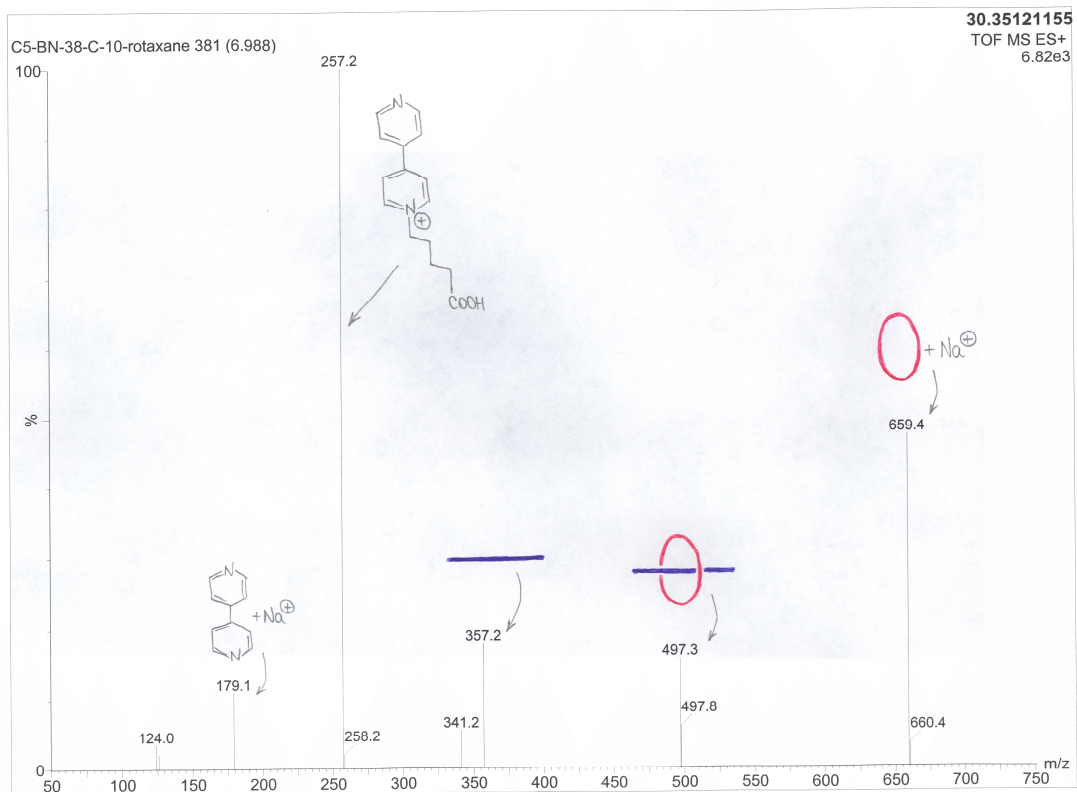

**Fig. S2:** ESI-MS spectrum for 4·2PF<sub>6</sub>/BN-38-C-10
